# Supplementary material for: Bortezomib enhances the anti-cancer effect of the novel Bruton’s tyrosine kinase inhibitor (BGB-3111) in mantle cell lymphoma expressing BTK
Source: publisher site journal article supplement (doi:10.18632/aging.203314), 2021-09-10
Supplement: Supplementary file [file aging-v13i17-203314-supplementary-material-SD1.pdf]

SUPPLEMENTARY FIGURES

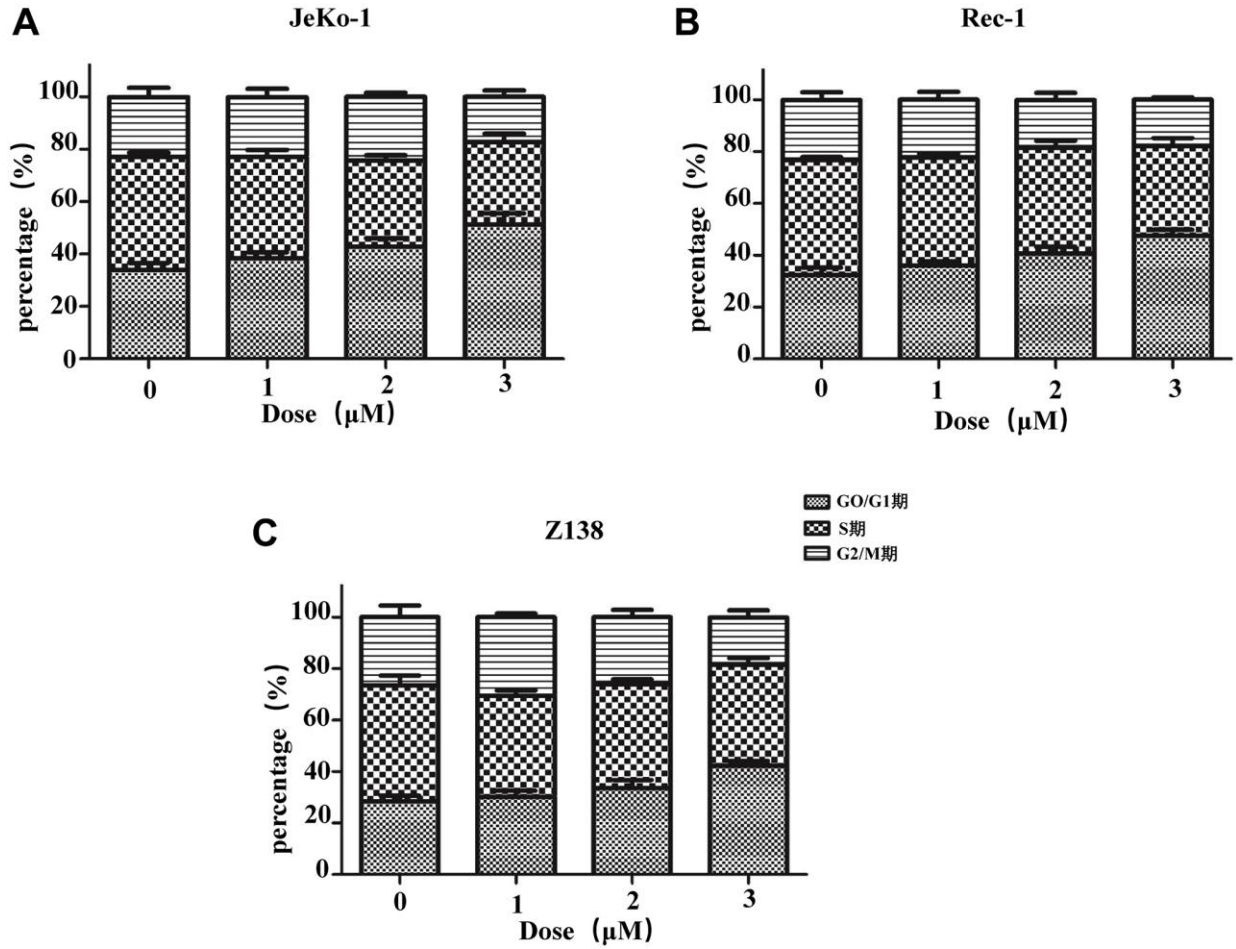

**Supplementary Figure 1.** Cell-cycle diagrams of Jeko-1 (A) Rec-1 (B) and Z138 (C) cells after treating with various concentrations of BGB-3111 for 48 h. The cell percentage of the cell cycle was detected by flow cytometry.

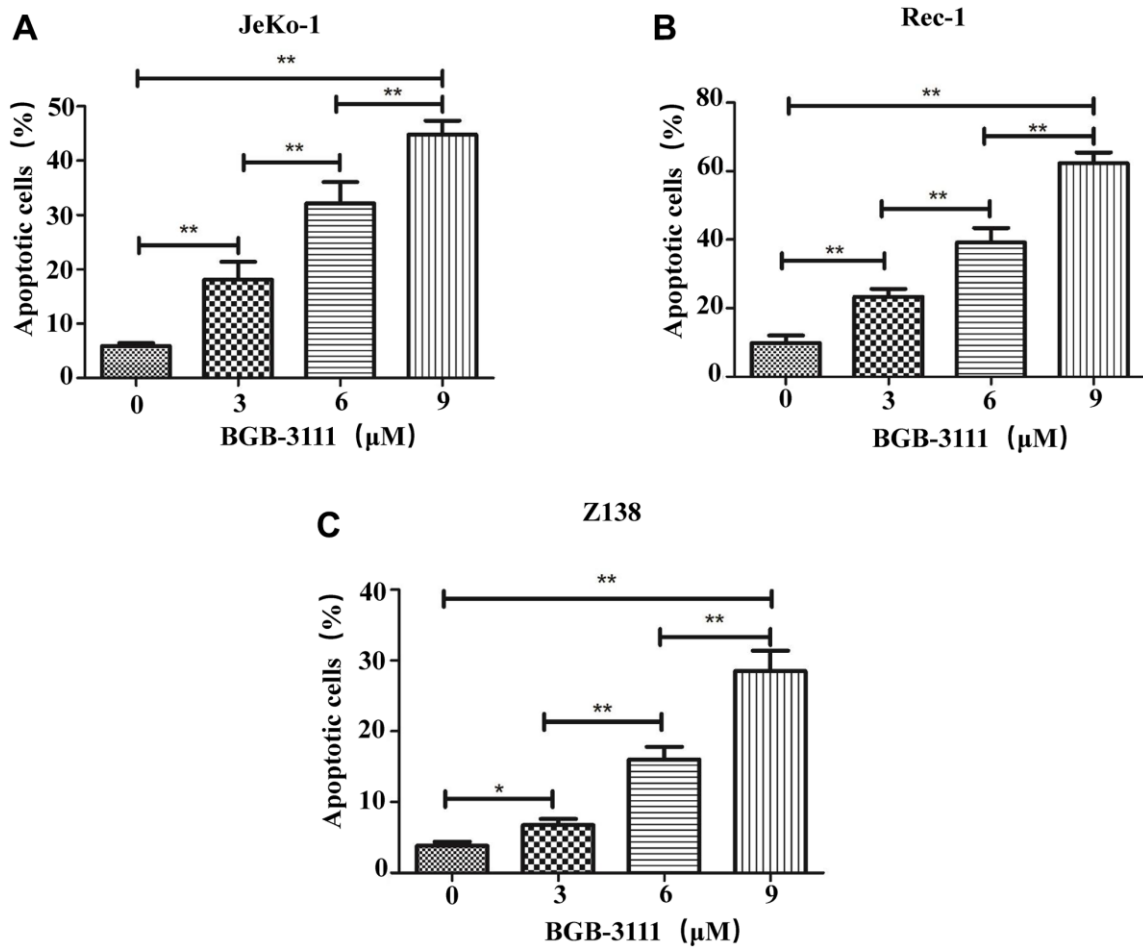

**Supplementary Figure 2.** Cell apoptotic distribution of Jeko-1 (A) Rec-1 (B) and Z138 (C) cells after treating with various concentrations of BGB-3111 for 48 h. Cell apoptotic rate was detected by flow cytometric analysis. \* $p < 0.05$ , \*\* $p < 0.01$ .

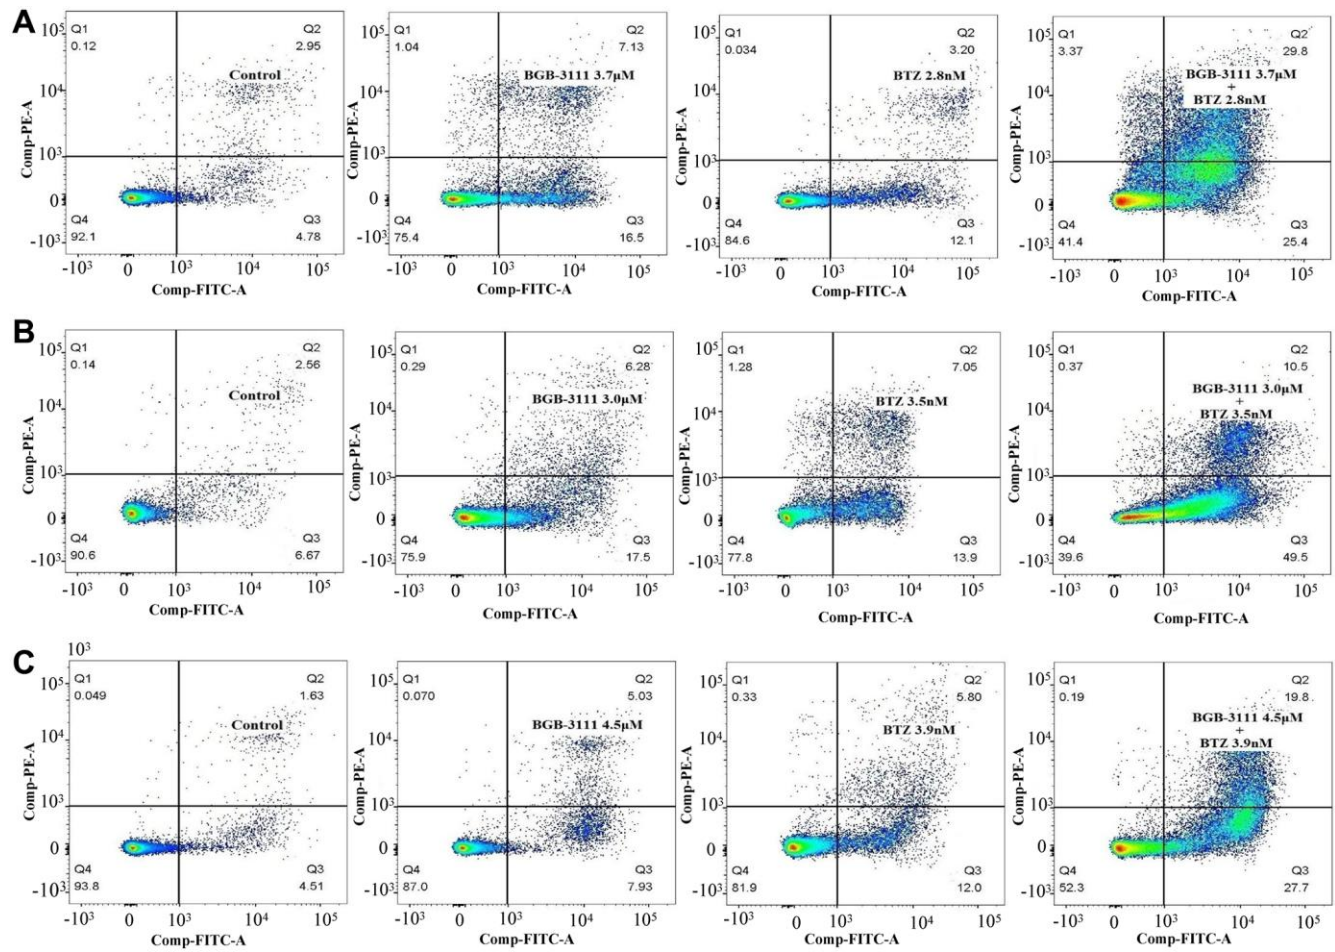

**Supplementary Figure 3.** Cell apoptosis in Jeko-1 (A) Rec-1 (B) and Z138 (C) cells after treating with low-dose BGB-3111, low-dose BTZ, and their combination for 48 h. Cell apoptotic rate was detected by flow cytometry.

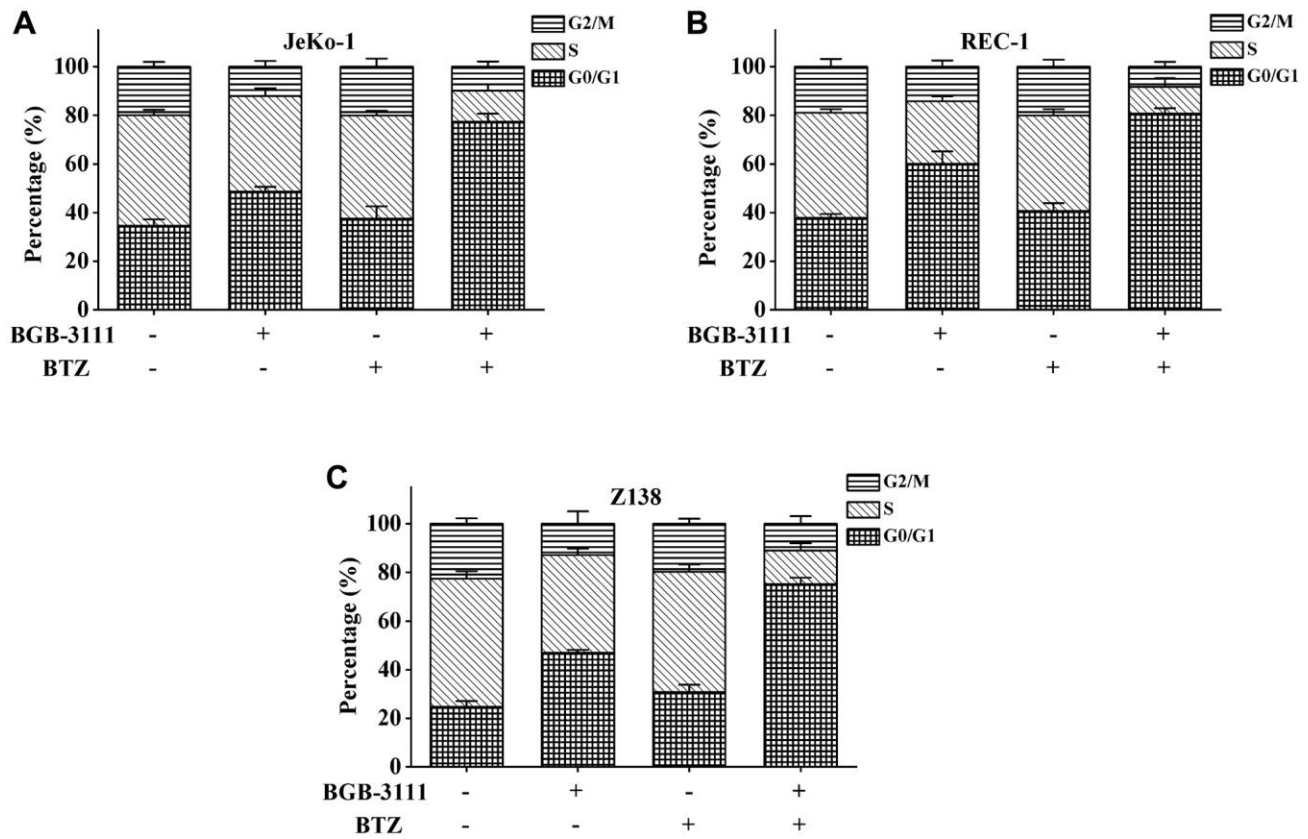

**Supplementary Figure 4.** Cell-cycle diagrams of Jeko-1 (A) Rec-1 (B) and Z138 (C) cells after treating with various concentrations of BGB-3111 and BTZ for 48 h. The cell percentage of the cell cycle was detected by flow cytometry.
