# Supplementary material for: Bortezomib enhances the anti-cancer effect of the novel Bruton’s tyrosine kinase inhibitor (BGB-3111) in mantle cell lymphoma expressing BTK
Source: Aging (Albany NY). 2021 Sep 10;13(17):21102–21. doi: 10.18632/aging.203314 (PMC8457562; doi:10.18632/aging.203314)
Supplement: Supplementary Table 1 [file aging-13-203314-s002.pdf]

## SUPPLEMENTARY TABLE

Supplementary Table 1. Association between BTK expression and clinicopathologic parameters.

| Characteristics |                       | Total ( <i>n</i> = 32) | BTK expression        |                      | $\chi^2$ | <i>P</i> value |
|-----------------|-----------------------|------------------------|-----------------------|----------------------|----------|----------------|
|                 |                       |                        | High ( <i>n</i> = 19) | Low ( <i>n</i> = 13) |          |                |
| Gender          |                       |                        |                       |                      | 0.076    | 0.545          |
|                 | Male                  | 23 (72%)               | 14 (73.7%)            | 9 (69.2%)            |          |                |
|                 | Female                | 9 (28%)                | 5 (26.3)              | 4 (30.8%)            |          |                |
| Age             |                       |                        |                       |                      | 1.943    | 0.153          |
|                 | <65                   | 20 (63%)               | 10 (52.6%)            | 10 (76.9%)           |          |                |
|                 | ≥65                   | 12 (37%)               | 9 (47.4%)             | 3 (23.1%)            |          |                |
| ECOG score      |                       |                        |                       |                      | 4.055    | 0.058          |
|                 | 0–1                   | 27 (84%)               | 14 (73.7%)            | 13 (100%)            |          |                |
|                 | 2–4                   | 5 (16%)                | 5 (26.3%)             | 0 (0%)               |          |                |
| B symptoms      |                       |                        |                       |                      | 0.162    | 0.487          |
|                 | No                    | 21 (66%)               | 13 (68.4%)            | 8 (61.5%)            |          |                |
|                 | Yes                   | 11 (34%)               | 6 (31.6%)             | 5 (38.5%)            |          |                |
| Stage           |                       |                        |                       |                      | 4.838    | 0.051          |
|                 | I-II                  | 3 (9%)                 | 0 (0%)                | 3 (23.1%)            |          |                |
|                 | III-IV                | 29 (91%)               | 19 (100%)             | 10 (76.9%)           |          |                |
| BM involvement  |                       |                        |                       |                      | 2.496    | 0.114          |
|                 | No                    | 12 (37%)               | 5 (26.3%)             | 7 (53.8%)            |          |                |
|                 | Yes                   | 20 (63%)               | 14 (73.7%)            | 6 (46.2%)            |          |                |
| WBC/mm          |                       |                        |                       |                      | 0.173    | 0.327          |
|                 | <10,000               | 21 (66%)               | 12 (63.2%)            | 9 (69.2%)            |          |                |
|                 | ≥10,000               | 11 (34%)               | 7 (36.8%)             | 4 (30.8%)            |          |                |
| β2-MG           |                       |                        |                       |                      | 0.275    | 0.521          |
|                 | ≤3 mg/L               | 18 (56%)               | 8 (47%)               | 10 (67%)             |          |                |
|                 | >3 mg/L               | 14 (44%)               | 9 (53%)               | 5 (33%)              |          |                |
| LDH(IU/L)       |                       |                        |                       |                      | 0.13     | 0.5            |
|                 | <250                  | 16 (50%)               | 9 (47.4%)             | 7 (53.8%)            |          |                |
|                 | ≥250                  | 16 (50%)               | 10 (52.6%)            | 6 (46.2%)            |          |                |
| Ki-67           |                       |                        |                       |                      | 5.783    | 0.019*         |
|                 | ≤30%                  | 19 (59%)               | 8 (42.1%)             | 11 (84.6%)           |          |                |
|                 | >30%                  | 13 (41%)               | 11 (57.9%)            | 2 (15.4%)            |          |                |
| MIPI score      |                       |                        |                       |                      | 4.522    | 0.038*         |
|                 | Low-Middle risk (<6)  | 23 (72%)               | 11 (57.9%)            | 12 (92.3%)           |          |                |
|                 | Middle-High risk (≥6) | 9 (28%)                | 8 (42.1%)             | 1 (7.7%)             |          |                |
